# Supplementary material
Source: PubMed Central journal article supplement (PMC6790631)
Supplement: NIHMS1054112-supplement-supplemental.pdf [file NIHMS1054112-supplement-supplemental.pdf]

**Supplementary Table S2. Primers used in this study.**

| <b>Primer</b>           | <b>Sequence (5'-3')</b>                                            | <b>Application</b>                                                               |
|-------------------------|--------------------------------------------------------------------|----------------------------------------------------------------------------------|
| <i>MoSSBI</i> -Flank-F1 | TAACTCGAGCAAGCCTTCCATGAACTG<br>A                                   | Amplifying <i>MoSSBI</i><br>5' flank sequence for<br>gene knock out              |
| <i>MoSSBI</i> -Flank-R1 | TAAATCGATCTTTGCGATGGTTTTGGGC                                       |                                                                                  |
| <i>MoSSBI</i> -Flank-F2 | TAAACTAGTGGTCGTGGCGTTTTGCATC<br>CTAT                               | Amplifying <i>MoSSBI</i><br>3' flank sequence for<br>gene knock out              |
| <i>MoSSBI</i> -Flank-R2 | TAACCGCGGTCTTGTTCCAGGCACGCT                                        |                                                                                  |
| <i>MoSSBI</i> -probe-F  | TAACCTACGAGGGCAGCAATGTC                                            | Amplifying probe<br><i>GENE</i> for southern<br>blot and transformants<br>screen |
| <i>MoSSBI</i> -probe-R  | TAAAACCATGGCCGAGATCTCCT                                            |                                                                                  |
| FL1111                  | GGAGGTCAACACATCAATG                                                | Amplifying probe<br><i>HPH</i> for southern blot                                 |
| FL1112                  | CTCTATTCCTTTGCCCTCG                                                |                                                                                  |
| <i>MoSSBI</i> -OF       | TAAATCGGGACCGGGCGGGTTGT                                            | Transformants screen                                                             |
| <i>HPH</i> comR         | GCTGATCTGACCAGTTGCCTA                                              |                                                                                  |
| <i>MoSSBI</i> -comF     | ACTCACTATAGGGCGAATTGGGTACTCA<br>AATTGGTTATCGTTTCAGTAAAGCCGAC<br>CT | <i>MoSSBI</i><br>complementation                                                 |
| <i>MoSSBI</i> -comR     | CACCACCCCGGTGAACAGCTCCTCGCCC<br>TTGCTCACGCGGGAAGACATGGCCTTGG<br>T  |                                                                                  |
| BD- <i>MoSSBI</i> -F    | TAACATATGATGTCGACAGAAGTTTATGA<br>C                                 | Construction of<br>pGBKT7- <i>MoSSBI</i>                                         |
| BD- <i>MoSSBI</i> -R    | TAAGAATTCTTAGCGGGAAGACATGGCC<br>TT                                 |                                                                                  |
| <i>MoSSBI</i> -CYFP-F   | CGACTCACTATAGGGCGAATTGGGTACT<br>CAAATTGATCGTTTCAGTAAAGCCGACC<br>T  | Construction of<br>pHz65- <i>MoSSBI</i>                                          |
| <i>MoSSBI</i> -CYFP-R   | GCTCACCATCGTGGCGATGGAGCGGCGG<br>GAAGACATGGCCTTGGT                  |                                                                                  |
| <i>MoSSBI</i> -V443F-F  | GCCCTGGTAGACGGGGAAGTCTGTTCTGTT<br>TGCTGCTGGTCAGCAAC                | <i>MoSSBI</i> point<br>mutation                                                  |
| <i>MoSSBI</i> -V443F-R  | GTTGCTGACCAGCAGCAAACAGAACAG<br>TTCCCCGTCTACCAGGGC                  |                                                                                  |
| <i>MoSSZI</i> -Flank-F1 | CCCAAGCTTATTCAGCGGCCCAAGGCCG<br>T                                  | Amplifying <i>MoSSZI</i><br>5' flank sequence for<br>gene knock out              |
| <i>MoSSZI</i> -Flank-R1 | GATATCTTGAAAGCTCTGATTGGAG                                          |                                                                                  |
| <i>MoSSZI</i> -Flank-F2 | CCCAAGCTTTGATTTGAGTTATGACTATT                                      | Amplifying <i>MoSSZI</i><br>3' flank sequence for<br>gene knock out              |
| <i>MoSSZI</i> -Flank-R2 | TCCCCGCGGAGGACATTGTGAGACAGA<br>GC                                  |                                                                                  |
| <i>MoSSZI</i> -probe-F  | TAAGCTGTTGCGCCTGAGGACCG                                            | Amplifying probe<br><i>GENE</i> for southern<br>blot and transformants<br>screen |
| <i>MoSSZI</i> -probe-R  | TAACGGCCACATCAGACTTGGTG                                            |                                                                                  |
| <i>MoSSZI</i> -OF       | TAATGTGGCATGAGTAACCTCCTA                                           | Transformants screen<br>with <i>HPH</i> comR                                     |
| <i>MoSSZI</i> -comF     | ACTCACTATAGGGCGAATTGGGTACTCA<br>AATTGGTTTGTGGCATGAGTAACCTCCTA      | <i>MoSSZI</i><br>complementation                                                 |

|                                |                                                                   |                                                                                  |
|--------------------------------|-------------------------------------------------------------------|----------------------------------------------------------------------------------|
| <i>MoSSZ1-comR</i>             | CACCACCCCGGTGAACAGCTCCTCGCCC<br>TTGCTCACCAATGTACCCCTGACACCAC<br>C |                                                                                  |
| <i>MoSSZ1-S-F</i>              | TTTCGTAGGAACCCAATCTTCAAATGA<br>GCGAAAACGGCACAAAG                  | Construction of<br><i>MoSSZ1-S</i>                                               |
| <i>MoSSZ1-S-R</i>              | TTCGAATTTAGCAGCAGCGGTTTCTTTC<br>AATGTACCCCTGACACCACC              |                                                                                  |
| AD/BD- <i>MoSSZ1-F</i>         | TAACATATGATGAGCGAAAACGGCACAA<br>AG                                | Construction of<br>pGADT7- <i>MoSSZ1</i><br>and pGBKT7- <i>MoSSZ1</i>            |
| AD/BD- <i>MoSSZ1-R</i>         | TAAGAATTCTCACAATGTACCCCTGACA<br>CC                                |                                                                                  |
| <i>MoSSZ1-NYFP/<br/>CYFP-F</i> | CGACTCACTATAGGGCGAATTGGGTACT<br>CAAATTGTGTGGCATGAGTAACCTCCTA      | Construction of<br>pHz65- <i>MoSSZ1</i> and<br>pHz68- <i>MoSSZ1</i>              |
| <i>MoSSZ1-NYFP-R</i>           | GCTCACCATCGTGGCGATGGAGCGCAAT<br>GTACCCCTGACACCACC                 |                                                                                  |
| <i>MoSSZ1-CYFP-R</i>           | GTTCGGGATCTTGCAGGCCGGGCGCAAT<br>GTACCCCTGACACCACC                 |                                                                                  |
| <i>MoZUO1-Flank-F1</i>         | CCGCTCGAGCTCGGCATGGCATCTGGCG<br>T                                 | Amplifying <i>MoZUO1</i><br>5' flank sequence for<br>gene knock out              |
| <i>MoZUO1-Flank-R1</i>         | CCAAGCTTTTTGCCTTCACTAACAAGA<br>T                                  |                                                                                  |
| <i>MoZUO1-Flank-F2</i>         | GGACTAGTATATTTAGTTATGTGTTGAT                                      | Amplifying <i>MoZUO1</i><br>3' flank sequence for<br>gene knock out              |
| <i>MoZUO1-Flank-R2</i>         | TCCCCGCGGCTCCGGGAACCATCACCAG<br>C                                 |                                                                                  |
| <i>MoZUO1-probe-F</i>          | TAATACCGCTACAATAGTCAAGA                                           | Amplifying probe<br><i>GENE</i> for southern<br>blot and transformants<br>screen |
| <i>MoZUO1-probe-R</i>          | TAAATCCTCGTCCAGGTACTCGA                                           |                                                                                  |
| <i>MoZUO1-OF</i>               | TAAATGATGATTATGCTGGTGTTG                                          | Transformants screen<br>with <i>HPHcomR</i>                                      |
| <i>MoZUO1-comF</i>             | ACTCACTATAGGGCGAATTGGGTACTCA<br>AATTGGTTATGATGATTATGCTGGTGTTG     | <i>MoZUO1</i><br>complementation                                                 |
| <i>MoZUO1-comR</i>             | CACCACCCCGGTGAACAGCTCCTCGCCC<br>TTGCTCACAGCAAAGACTTGGCCTCGC       |                                                                                  |
| <i>MoZUO1-S-F</i>              | TTTCGTAGGAACCCAATCTTCAAATGG<br>CTACCGCTACAATAGT                   | Construction of<br><i>MoZUO1-S</i>                                               |
| <i>MoZUO1-S-R</i>              | TTCGAATTTAGCAGCAGCGGTTTCTTTAG<br>CAAAGACTTGGCCTCGC                |                                                                                  |
| AD- <i>MoZUO1-F</i>            | TAACATATGATGGCTACCGCTACAATAGT<br>C                                | Construction of<br>pGADT7- <i>MoZUO1</i>                                         |
| AD- <i>MoZUO1-R</i>            | TAAGAATTCCTAAGCAAAGACTTGGCC<br>TC                                 |                                                                                  |
| <i>MoZUO1-NYFP-F</i>           | CGACTCACTATAGGGCGAATTGGGTACT<br>CAAATTGCTCGGCATGGCATCTGGCGT       | Construction of<br>pHz65- <i>MoZUO1</i>                                          |
| <i>MoZUO1-NYFP-R</i>           | GCTCACCATCGTGGCGATGGAGCGAGCA<br>AAAGACTTGGCCTCGC                  |                                                                                  |
| <i>MoMKK1-S-F</i>              | TTTCGTAGGAACCCAATCTTCAAATGA<br>AGAATCCCATATCTAGT                  | Construction of<br><i>MoMKK1-S</i>                                               |
| <i>MoMKK1-S-R</i>              | TTCGAATTTAGCAGCAGCGGTTTCTTCT                                      |                                                                                  |

|                         |                                                          |                                         |
|-------------------------|----------------------------------------------------------|-----------------------------------------|
|                         | CTGCAGGCTTGGCTTCACCC                                     |                                         |
| <i>AD-MoMKK1-F</i>      | TAACATATGATGCACGATCAAGAAGCTGCC                           | Construction of<br><i>pGADT7-MoMKK1</i> |
| <i>AD-MoMKK1-R</i>      | TAAGAATTCTCACTCTGCAGGCTTGGCTT                            |                                         |
| <i>MoMKK1-NYFP-F</i>    | CGACTCACTATAGGGCGAATTGGGTACTCAAATTGGGTATGTTTCGCCGAAAATG  | Construction of<br><i>pHz65-MKK1</i>    |
| <i>MoMKK1-NYFP-R</i>    | GCTCACCATCGTGGCGATGGAGCGCTCTGCAGGCTTGGCTTCA              |                                         |
| <i>MoMKK1-GFP-F</i>     | ACTCACTATAGGGCGAATTGGGTACTCAAATTGGTTGGTATGTTTCGCCGAAAATG | Construction of<br><i>MoMKK1-GFP</i>    |
| <i>MoMKK1-GFP-R</i>     | CACCACCCCGGTGAACAGCTCCTCGCCCTTGCTCACCTCTGCAGGCTTGGCTTCA  |                                         |
| <i>MoMKK1-GFP-qRT-F</i> | AGCTACTACATGGCGCCCGAG                                    | qRT-PCR Primer of<br><i>MoMKK1-GFP</i>  |
| <i>MoMKK1-GFP-qRT-R</i> | CTCACTATAGGGCGAATTGGG                                    |                                         |

**Supplementary Table S1. The putative MoMkk1-interacting proteins identified by co-IP**

| Gene ID   | Putative protein name                                                |    |
|-----------|----------------------------------------------------------------------|----|
| MGG_01084 | glyceraldehyde-3-phosphate dehydrogenase                             |    |
| MGG_11259 | hypothetical protein                                                 |    |
| MGG_02624 | transaldolase                                                        |    |
| MGG_04400 | ATP-dependent RNA helicase eIF4A                                     |    |
| MGG_05673 | 40S ribosomal protein S3                                             |    |
| MGG_04467 | 60S acidic ribosomal protein P0                                      |    |
| MGG_00175 | 6-phosphogluconate dehydrogenase                                     |    |
| MGG_16149 | ADP ATP carrier protein                                              |    |
| MGG_06530 | aspartate aminotransferase                                           |    |
| MGG_08905 | triosephosphate isomerase                                            |    |
| MGG_06712 | 5-methyltetrahydropteroyltriglutamate-homocysteine methyltransferase | S- |
| MGG_10265 | hypothetical protein                                                 |    |
| MGG_09952 | GTP-binding nuclear protein GSP1/Ran                                 |    |
| MGG_08622 | nucleoside diphosphate kinase                                        |    |
| MGG_10447 | peptidyl-prolyl cis-trans isomerase                                  |    |
| MGG_02659 | 60S ribosomal protein L14                                            |    |
| MGG_04719 | guanine nucleotide-binding protein subunit beta-like protein         |    |
| MGG_03641 | elongation factor 1-alpha                                            |    |
| MGG_06269 | 60S ribosomal protein L2                                             |    |
| MGG_05155 | adenosylhomocysteinase                                               |    |
| MGG_05063 | phosphoglycerate kinase                                              |    |
| MGG_10607 | enolase                                                              |    |
| MGG_00349 | 40S ribosomal protein S13                                            |    |
| MGG_06919 | 40S ribosomal protein S3aE                                           |    |
| MGG_06720 | ATP-citrate synthase subunit 2                                       |    |
| MGG_03653 | 60S ribosomal protein L20                                            |    |
| MGG_13806 | 14-3-3 family protein                                                |    |
| MGG_16204 | 60S ribosomal protein L12                                            |    |
| MGG_06958 | hsp70-like protein                                                   |    |
| MGG_03982 | actin                                                                |    |

|           |                                                          |
|-----------|----------------------------------------------------------|
| MGG_04438 | ADP-ribosylation factor                                  |
| MGG_06936 | elongation factor 1-gamma                                |
| MGG_02370 | mitochondrial phosphate carrier protein                  |
| MGG_06685 | cytochrome c                                             |
| MGG_05661 | 40S ribosomal protein S18                                |
| MGG_00942 | branched-chain-amino-acid aminotransferase               |
| MGG_04104 | 60S ribosomal protein L22                                |
| MGG_07752 | ATP synthase subunit alpha                               |
| MGG_04829 | 60S ribosomal protein L9-A                               |
| MGG_07753 | 60S ribosomal protein L11                                |
| MGG_03372 | 40S ribosomal protein S20                                |
| MGG_03226 | cytochrome b-c1 complex subunit 2                        |
| MGG_17802 | hypothetical protein                                     |
| MGG_16486 | hypothetical protein                                     |
| MGG_06658 | 40S ribosomal protein S5                                 |
| MGG_04484 | 60S ribosomal protein L18                                |
| MGG_05238 | 40S ribosomal protein S14                                |
| MGG_11513 | heat shock protein SSB1                                  |
| MGG_01592 | eukaryotic translation initiation factor 2 subunit gamma |
| MGG_04489 | non-histone chromosomal protein 6                        |
| MGG_04612 | 60S ribosomal protein L8-B                               |
| MGG_03185 | ATP synthase subunit beta                                |
| MGG_08741 | tRNA selenocysteine-associated protein 1                 |
| MGG_02660 | nascent polypeptide-associated complex subunit alpha     |
| MGG_05237 | 60S ribosomal protein L7                                 |
| MGG_00968 | mitochondrial outer membrane protein porin               |
| MGG_10185 | 60S ribosomal protein L23a                               |
| MGG_07202 | citrate synthase                                         |
| MGG_11776 | 40S ribosomal protein S0                                 |
| MGG_03670 | subtilisin-like proteinase Spm1                          |
| MGG_03152 | ATP synthase subunit 5                                   |
| MGG_02872 | 40S ribosomal protein S27                                |
| MGG_16866 | cytochrome b-c1 complex subunit Rieske                   |

|           |                                                          |
|-----------|----------------------------------------------------------|
| MGG_01113 | 40S ribosomal protein S10-A                              |
| MGG_06759 | heat shock protein 90                                    |
| MGG_06249 | translationally controlled tumor protein                 |
| MGG_06693 | 60S ribosomal protein L27-A                              |
| MGG_09367 | malate dehydrogenase                                     |
| MGG_06668 | hypothetical protein                                     |
| MGG_03600 | mitochondrial-processing peptidase subunit beta          |
| MGG_04114 | 40S ribosomal protein S17                                |
| MGG_01588 | 14-3-3 family protein                                    |
| MGG_03165 | heat shock protein 60                                    |
| MGG_08190 | 60S ribosomal protein L4-A                               |
| MGG_02747 | 40S ribosomal protein S4-A                               |
| MGG_03727 | 50S ribosomal protein L31e                               |
| MGG_05283 | uricase                                                  |
| MGG_02710 | peroxiredoxin type-2                                     |
| MGG_02921 | hypothetical protein                                     |
| MGG_01742 | elongation factor 2                                      |
| MGG_13645 | 50S ribosomal protein L13e                               |
| MGG_06691 | 4-hydroxyphenylpyruvate dioxygenase                      |
| MGG_01712 | isocitrate dehydrogenase subunit 2                       |
| MGG_07130 | proteasome component PUP2                                |
| MGG_08835 | malate dehydrogenase                                     |
| MGG_12569 | hypothetical protein                                     |
| MGG_01995 | isocitrate dehydrogenase subunit 1                       |
| MGG_13200 | eukaryotic translation initiation factor 2 subunit alpha |
| MGG_10292 | hypothetical protein                                     |
| MGG_12797 | hypothetical protein                                     |
| MGG_09396 | HET-C2 protein                                           |
| MGG_15774 | ketol-acid reductoisomerase                              |
| MGG_04135 | mitochondrial F1F0 ATP synthase subunit F                |
| MGG_15739 | inorganic pyrophosphatase                                |
| MGG_03051 | aspartate-semialdehyde dehydrogenase                     |
| MGG_13563 | hypothetical protein                                     |

|           |                                                  |
|-----------|--------------------------------------------------|
| MGG_01689 | rho GDP dissociation inhibitor                   |
| MGG_01092 | homocitrate synthase                             |
| MGG_04444 | 60S ribosomal protein L6-B                       |
| MGG_07076 | oxidoreductase                                   |
| MGG_02953 | 60S ribosomal protein L21-B                      |
| MGG_08810 | 2 5-diketo-D-gluconic acid reductase A           |
| MGG_17072 | dihydrolipoyl dehydrogenase                      |
| MGG_01111 | cytochrome c oxidase subunit 6B                  |
| MGG_04752 | ATP synthase subunit 4                           |
| MGG_08637 | mitochondrial import receptor subunit tom-40     |
| MGG_10569 | pyruvate dehydrogenase E1 component subunit beta |
| MGG_03065 | V-type proton ATPase proteolipid subunit 2       |
| MGG_05980 | pyridoxine biosynthesis protein PDX1             |
| MGG_15868 | argininosuccinate synthase                       |
| MGG_06127 | profilin                                         |
| MGG_18003 | ATP synthase subunit D                           |
| MGG_03149 | dihydrolipoyllysine-residue succinyltransferase  |
| MGG_13499 | acetyl-CoA acetyltransferase                     |
| MGG_01807 | NEDD8-conjugating enzyme UBC12                   |
| MGG_02252 | tetrahydroxynaphthalene reductase                |
| MGG_05892 | hypothetical protein                             |
| MGG_02525 | alanine-glyoxylate aminotransferase 1            |
| MGG_13438 | xaa-Pro dipeptidase                              |
| MGG_10583 | 12-oxophytodienoate reductase 1                  |
| MGG_06479 | 40S ribosomal protein S22                        |
| MGG_10568 | sterol 24-C-methyltransferase                    |
| MGG_15540 | hypothetical protein                             |
| MGG_07048 | 60S ribosomal protein L5                         |
| MGG_10252 | hypothetical protein                             |
| MGG_15527 | hypothetical protein                             |
| MGG_03521 | aconitate hydratase                              |
| MGG_12574 | aspartyl-tRNA synthetase                         |
| MGG_09194 | 60S ribosomal protein L17                        |

|           |                                              |
|-----------|----------------------------------------------|
| MGG_12868 | enoyl-CoA hydratase                          |
| MGG_01521 | cell division control protein 3              |
| MGG_02697 | serologically defined colon cancer antigen 1 |
| MGG_00221 | 40S ribosomal protein S7                     |
| MGG_01631 | UTP-glucose-1-phosphate uridylyltransferase  |
| MGG_03578 | histone H2B                                  |

---



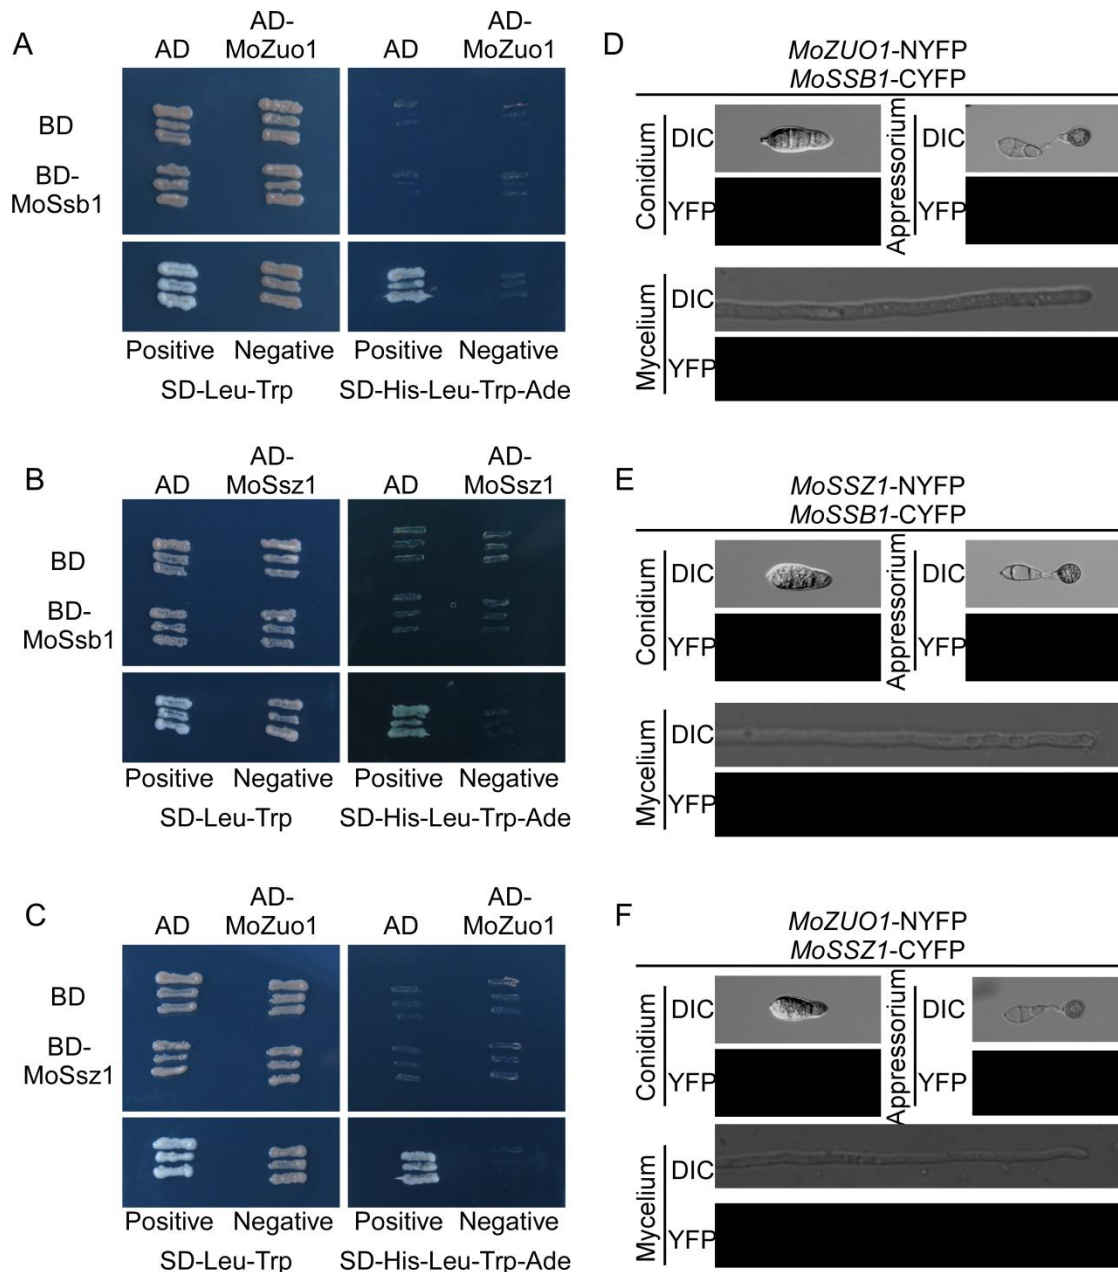

Supplementary Figure S8. The interactions among MoSsb1, MoSsz1 and MoZuo1 could not be established by yeast two-hybrid and BiFC. A-C, Yeast two hybrid assays for the interaction among MoSsb1, MoSsz1 and MoZuo1. The transformants were grown on SD-Leu-Trp and on selective SD-Leu-Trp-His-Ade for 3 d. No yeast cells expressing the pGADT7-*MoZUO1*/pGBKT7-*MoSSB1*, pGADT7-*MoSSZ1*/pGBKT7-*MoSSB1* and pGADT7-*MoZUO1*/pGBKT7-*MoSSZ1* were grown on selective SD-Leu-Trp-His-Ade. D-F, BiFC assays for the interaction among MoSsb1, MoSsz1 and MoZuo1. Mycelium, conidium and appressorium stages of transformants expressing the *MoZUO1*-NYFP/*MoSSB1*-CYFP, *MoSSZ1*-NYFP/*MoSSB1*-CYFP and *MoZUO1*-NYFP/*MoSSZ1*-CYFP constructs were tested by both DIC and epifluorescence microscopy. More than 100 samples of every stage were observed and no yellow fluorescent was detected.

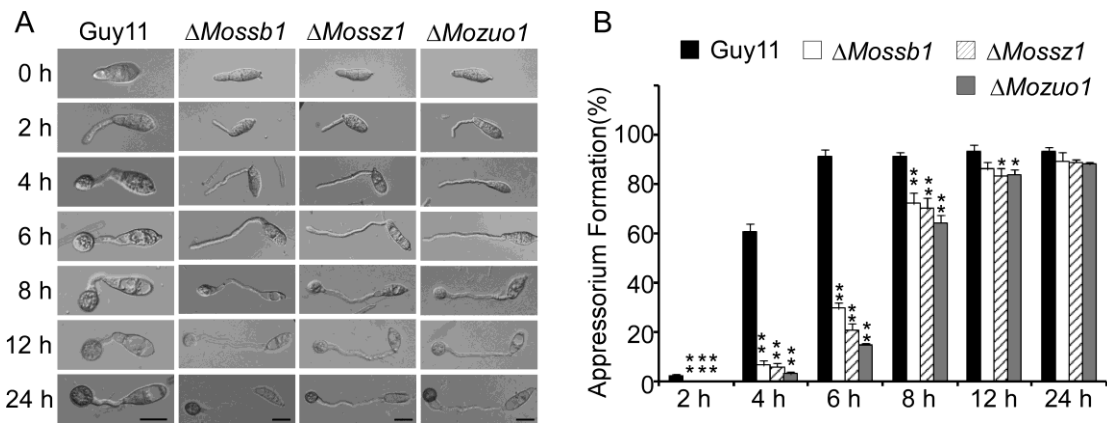

Supplementary Fig. S7. Appressorium formation assay. Conidia of the indicated strains were harvested from 10-day-old SDC agar cultures, filtered through one-layer Miracloth. Appressorial formation were observed and counted on hydrophobic slides at 0, 2, 4, 6, 8, 12 and 24 h and then photographed. At least 100 conidia per replicate were examined. The experiment was performed three times with similar results. Asterisks indicate significant differences at  $P < 0.01$ , according to Duncan's range test.

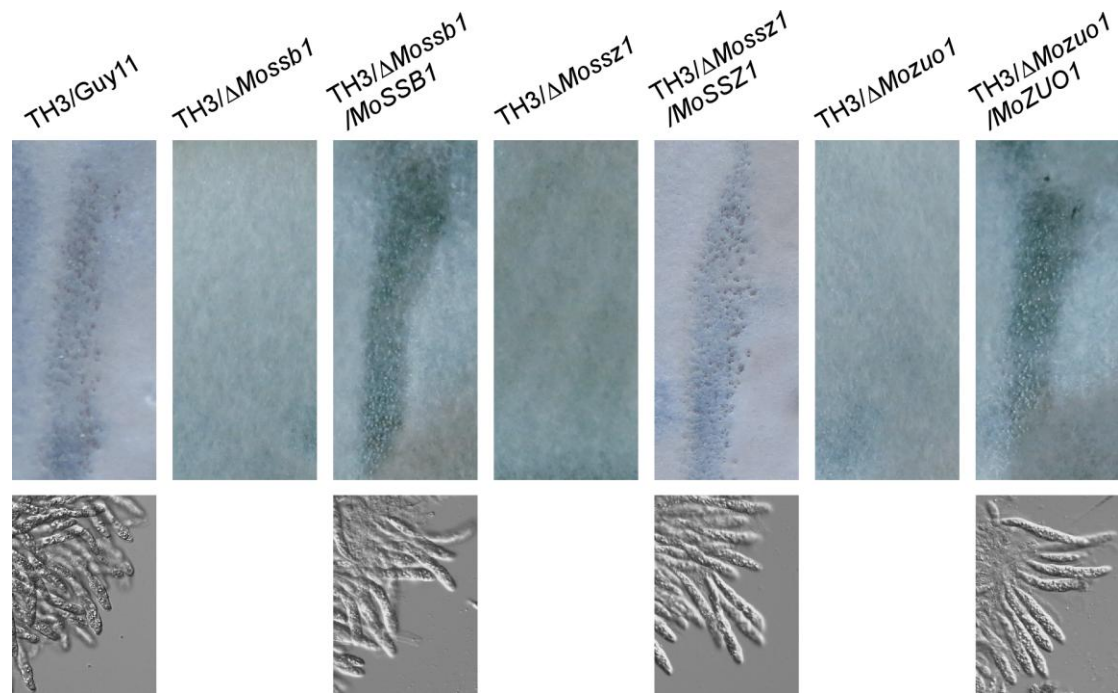

Supplementary Fig. S6. MoSsb1, MoSsz1 and MoZuo1 are involved in mating. Perithecia production was photographed following three weeks of incubation. Cross between TH3 (*MATI-1*) and Guy11 (*MATI-2*) represents the positive control. Cross between TH3 and each mutant failed to produce perithecia or ascospores. Cross between the complemented strain and TH3 produce normal perithecia and ascospores. The experiment was performed three times with similar results.

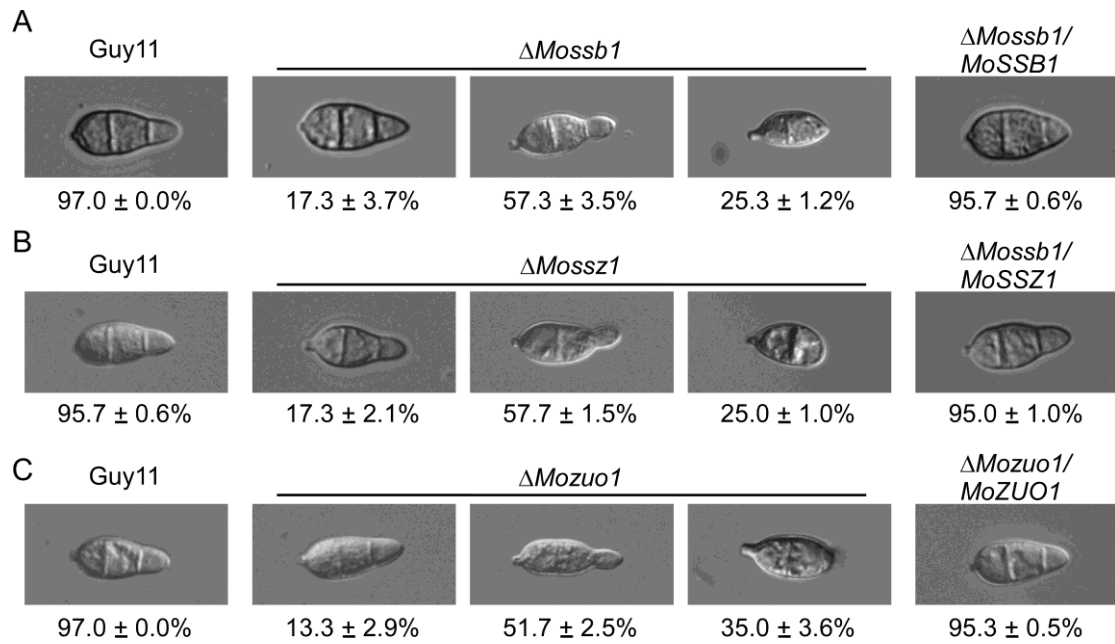

Supplementary Fig. S5. Conidia shape comparison. A-C, Conidia of the indicated strains were harvested from SDC medium and observed under a microscope.

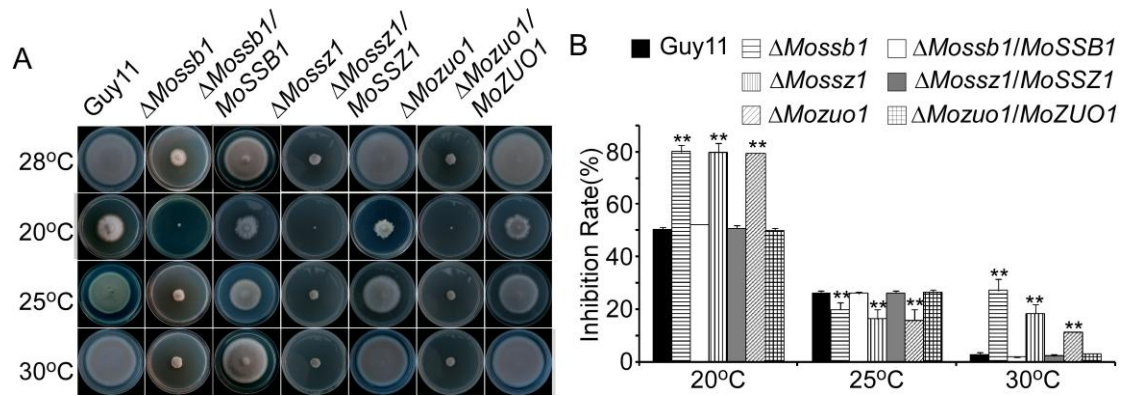

Supplementary Fig. S4. Resistance of  $\Delta Mossb1$ ,  $\Delta Mossz1$  and  $\Delta Mozuo1$  mutants to temperature stress inducer. A, Growth of Guy11,  $\Delta Mossb1$ ,  $\Delta Mossz1$ ,  $\Delta Mozuo1$  mutants and their complemented strains in media cultured in 20, 25, 28 and 30°C after 10 days before being photographed. B, Colony diameters were measured in each independent biological experiment after 10 days. The growth inhibition in 20, 25 and 30°C is relative to the growth rate in 28°C. Three independent biological experiments were performed with three replicates each time. Error bars represent standard deviation and asterisks represent significant differences ( $P < 0.01$ )

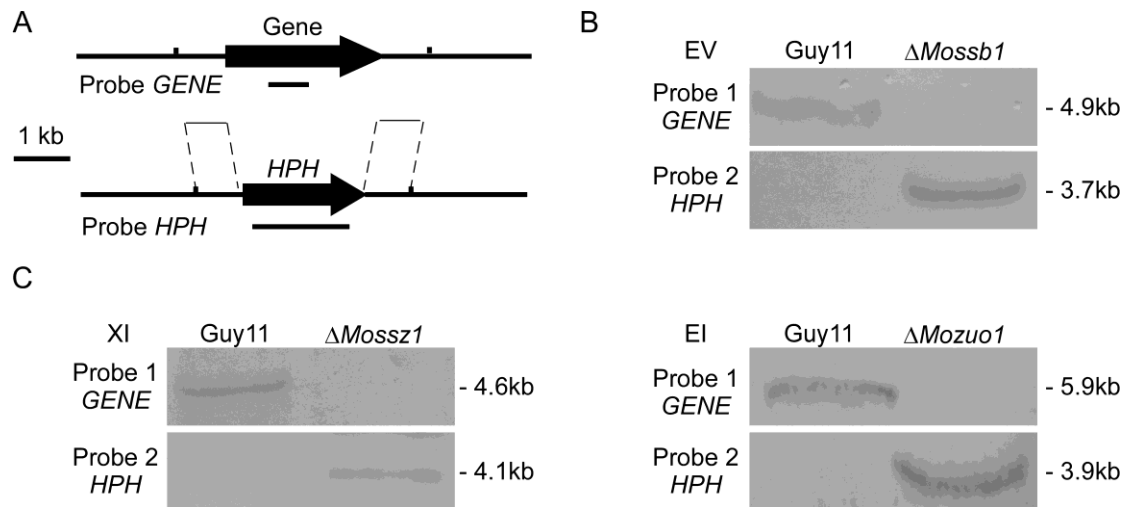

Supplementary Fig. S3. Southern blot analysis of the *MoSSBI*, *MoSSZI* and *MoZUOI* gene deletion mutants. A, Strategy of knockout in the *M. oryzae* genome. Thick arrows indicate the orientations of the genes and *HPH* genes. Thin lines below the arrows indicate the probe sequence of each gene. B, Southern blot analysis of *MoSSBI* gene knockout mutant with the gene-specific probe and hygromycin phosphotransferase (*HPH*) probe. The restriction enzyme *EcoRV* was used for Southern blot. C, Southern blot analysis of *MoSSZI* and *MoZUOI* gene knockout mutants with the gene-specific probe and *HPH* probe. The restriction enzyme *XhoI* and *EcoRI* were used for Southern blot, respectively.

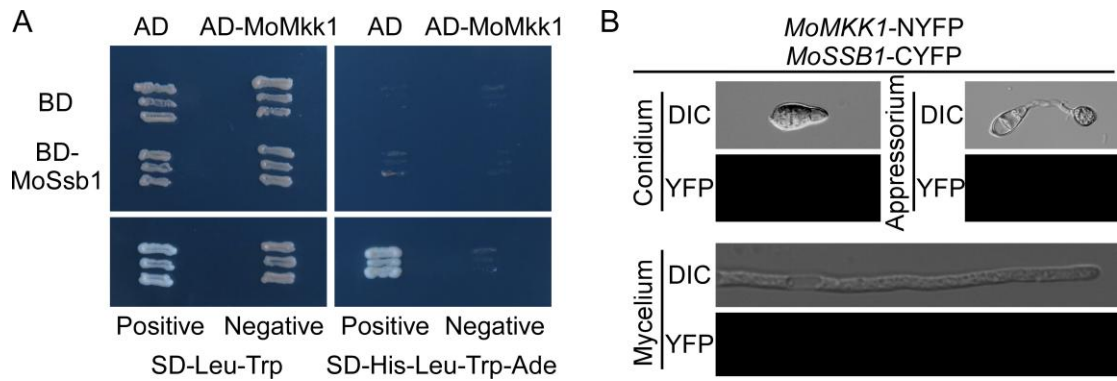

Supplementary Fig. S2. The interactions between MoSsb1 and MoMkk1 could not be established by yeast two-hybrid and BiFC. A, Yeast two hybrid assays for the interaction between MoSsb1 and MoMkk1. MoSsb1 was inserted into vector pGBKT7 and MoMkk1 was inserted into pGADT7. The transformants were plated on SD-Leu-Trp and on selective SD-Leu-Trp-His-Ade for 3 d. Yeast cells expressing the pGADT7-*MoMkk1* and pGBKT7-*MoSsb1* failed to grow on selective SD-Leu-Trp-His-Ade. B, BiFC assays for the interaction between MoSsb1 and MoMkk1. Mycelium, conidium and appressorium stages of transformants expressing the *MoMkk1*-NYFP/*MoSsb1*-CYFP constructs were tested by both DIC and epifluorescence microscopy. More than 100 samples of every stage were observed and no yellow fluorescent was detected.

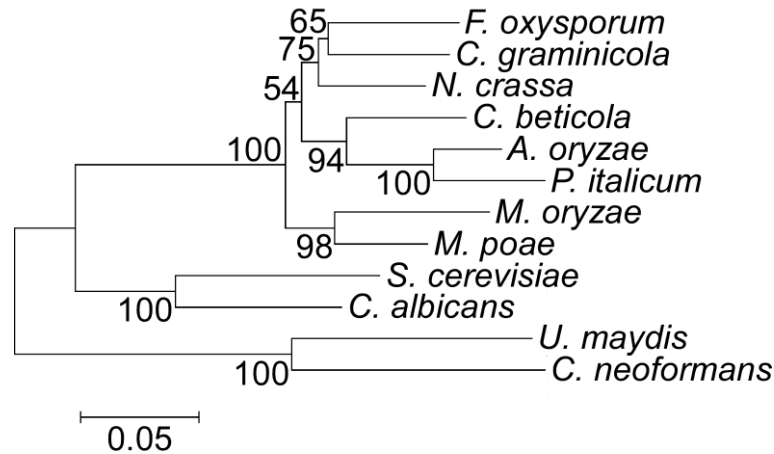

Supplementary Fig. S1. Phylogenetic analysis of MoSsb1. Neighbour-joining tree with 1000 bootstrap replicates of phylogenetic relationships between MoSsb1 homologues in fungi. The sequences were collected from the National Center for Biotechnology Information (NCBI) database. Abbreviations numbers correspond to species names and GenBank accession numbers are as follows: *F. oxysporum* (*Fusarium oxysporum* XP\_018233273.1), *C. graminicola* (*Colletotrichum graminicola* XP\_008089456.1), *N. crassa* (*Neurospora crassa* XP\_964602.3), *A. oryzae* (*Aspergillus oryzae* OOO07910.1), *S. cerevisiae* (*Saccharomyces cerevisiae* NP\_014190.1), *C. albicans* (*Candida albicans* XP\_716208.1), *U. maydis* (*Ustilago maydis* XP\_011391166.1), *C. neoformans* (*Cryptococcus neoformans* XP\_012046659.1), *P. italicum* (*Penicillium italicum* KGO65718.1), *C. beticola* (*Cercospora beticola* XP\_023452832.1) and *M. poae* (*Magnaportheopsis poae* KLU88584.1).
